# Supplementary material for: Extrapolation study for determining the time since injury in a rat subcutaneous hematoma model utilizing ATR-FTIR spectroscopy
Source: Royal Society of Chemistry journal article supplement (doi:10.1039/d3ay01898a), 2024-01-01
Supplement: d3ay01898a1.pdf [file d3ay01898a1.pdf]

Table S1. Summary of the grouping of the calibration and prediction data set.

|                   | Site             | Time since Injury (TSI) |      |      |      |      |      | Total |     |
|-------------------|------------------|-------------------------|------|------|------|------|------|-------|-----|
|                   |                  | 0d                      | 1d   | 2d   | 3d   | 4d   | 5d   |       | 6d  |
| Calibration group | Back             | 15                      | 15   | 15   | 15   | 13   | 12   | 9     | 187 |
|                   | Head             | 15                      | 15   | 15   | 15   | 14   | 11   | 8     |     |
| Prediction group  |                  | 0.5d                    | 1.5d | 2.5d | 3.5d | 4.5d | 5.5d |       |     |
|                   | Neck             | 5                       | 5    | 5    | 5    | 5    | 5    |       |     |
|                   | Right upper limb | 5                       | 5    | 5    | 5    | 5    | 5    |       | 90  |
|                   | Left lower limb  | 5                       | 5    | 5    | 5    | 5    | 5    |       |     |

As the table showed, there were 300 samples for the whole experiment. Thirteen of these samples were discarded because of local infection or almost complete absorption of the hematoma. Thus, a total of 277 samples were used for analysis.

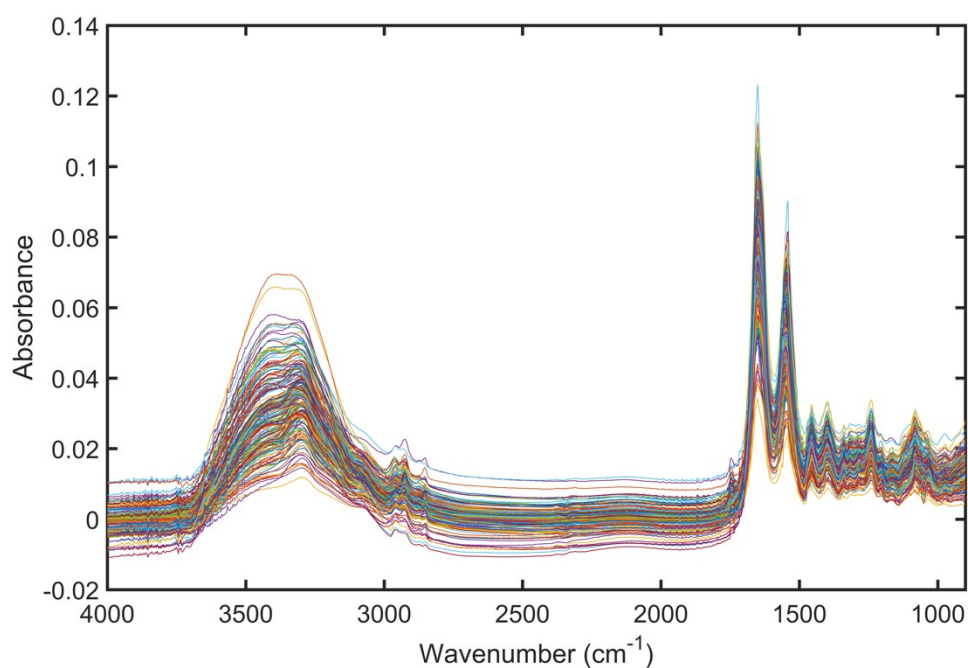

Figure S1. The figure of raw spectra.

Table S2. The number of correctly classified hematomas of different volumes obtained by the k-means clustering algorithm.

| Site | Volumes    |            |            |           |           |           |
|------|------------|------------|------------|-----------|-----------|-----------|
|      | 40 $\mu$ L | 20 $\mu$ L | 10 $\mu$ L | 5 $\mu$ L | 2 $\mu$ L | 1 $\mu$ L |
| Back | 10         | 10         | 10         | 10        | 10        | 6         |
| Head | 10         | 10         | 10         | 10        | 10        | 4         |
